# Supplementary material for: Transcriptomic and fluxomic changes in Streptomyces lividans producing heterologous protein
Source: Microb Cell Fact. 2018 Dec 21;17:198. doi: 10.1186/s12934-018-1040-6 (PMC6302529; doi:10.1186/s12934-018-1040-6)
Supplement: Supplementary file 4 — Additional file 4. Biomass and CelA composition used in 13C-based metabolic flux analysis. [file 12934_2018_1040_MOESM4_ESM.xlsx]

## Sheet: macromolecular
Additional file 4
Overview of the newly obtained Streptomyces lividans macromolecular composition upon inclusion of plasmid DNA
Component	Value Coze	Plasmid added	Rescaled
Protoplast	g.g-1 DW
Protein	0.411	0.411	0.409957
DNA	0.06	0.0625449	0.0623861
RNA	0.167	0.167	0.166576
Lipids
Polar (Phospholipids)	0.033	0.033	0.0329162
Non-polar (TAGs)	0.02	0.02	0.0199492
Small molecules	0.026	0.026	0.025934
Cell wall
Peptidoglycan	0.114	0.114	0.113711
Carbohydrates	0.044	0.044	0.0438883
Teichoich acid	0.068	0.068	0.0678274
Ash	0.057	0.057	0.0568553
SUM	1	1.00254	1
Values of Coze et al. were experimentally obtained for Streptomyces coelicolor:
Coze F, Gilard F, Tcherkez G, Virolle MJ, Guyonvarch A. Carbon-flux distribution within Streptomyces coelicolor metabolism: A comparison between the actinorhodin-producing strain M145 and its non-producing derivative M1146. PLoS ONE. 2013;8(12).

## Sheet: precursors
Additional file 4
Overview of the calculated metabolic precursor need for the synthesis of 1 gram of Streptomyces lividans. Precursors for protein are subtracted from the total precursor need. The last row gives the stoichiometric coefficients used to implement precursor effluxes constraints in the network model (see FTBL file and Additional File 2).
	Effluxes of metabolic precursor to biomass [mmol/g biomass]
	AcCoa	E4P	F6P	G6P	GAP	OAA	AKG	PEP	PGA	PYR	R5P	C1	ATP	NADH	NADPH
Protoplast
Protein	0.318133	0.272686	0	0	0	1.07559	0.734736	0.503711	0.651415	2.04514	0.109832	-0.257536	22.0754	-1.56415	8.57823
DNA	0	0	0	0	0	0.100928	0	0	0.100928	0	0.201857	0.128906	1.9793	-0.302785	0.35874
RNA	0	0	0	0	0	0.282032	0	0	0.237512	0	0.519544	0.237512	4.37469	-0.712537	0.382005
Lipids
Polar (Phospholipids)	0.759852	0	0	0	0.0574316	0	0	0	0.03584	0	0	0	0.712361	-0.03584	1.42301
Non-polar (TAGs)	0.593738	0	0	0	0.0248143	0	0	0	0	0	0	0	0.519295	0	1.0634
Small molecules	0.00218683	0.0121981	0	0	0.00925718	0.0324509	0.0158428	0.0243962	0.0654477	0.052415	0.0641863	0.0227317	0.662283	-0.00252583	0.22113
Cell wall
Peptidoglycan	0.25121	0	0.25121	0	0	0.129936	0.115643	0.114777	0.110879	0.454776	0	-0.110879	1.33187	-0.110879	1.05595
Carbohydrates	0.0832489	0	0.0832489	0.166498	0	0	0	0	0	0	0	0	0.332996	0	0
Teichoich acid	0.00877888	0	0.00877888	0	0.421386	0.0175578	0	0	0	0.00877888	0	0	0.465281	0.421386	0.0351155
Ash
Total sum	2.01715	0.284884	0.343237	0.166498	0.512889	1.6385	0.866222	0.642884	1.20202	2.56111	0.895419	0.0207347	32.4535	-2.30733	13.1176
Sum without proteins	1.69901	0.0121981	0.343237	0.166498	0.512889	0.562905	0.131486	0.139173	0.550607	0.51597	0.785587	0.278271
Scaled to alanine [mmol/mmol alanine]	4.673	0.03355	0.944047	0.457939	1.41066	1.54823	0.361641	0.382784	1.5144	1.41913	2.1607	0.765362
Abbreviations: AcCoa, acetyl-coenzymeA; E4P, erythrose-4-phosphate; F6P, fructose-6-phosphate; G6P, Glucose-6-phosphate; GAP, glyceraldehyde-3-phosphate; OAA, oxaloacetate; AKG, a-ketoglutarate; PEP, phosphoenolpyruvate; PGA, phosphoglycerate; PYR, pyruvate; R5P, ribose-5-phosphate.

## Sheet: protein
Additional file 4
Overview of the calculated amino acid composition of biomass protein and CelA, including scaling factors used as biomass constraints in the network model (see FTBL file and Additional File 2).
	Amino acid composition of biomass protein			Amino acid composition of CelA
Amino acid	mmol/	mmol/	Scaled to	Amino acid	Number of	mmol/	Scaled to
	g protein	g biomass	alanine		amino acids	g protein	alanine
Alanine	0.886876	0.363581	1	Alanine	31	1.07858	1
Arginine	0.508106	0.208301	0.572917	Arginine	18	0.626274	0.580645
Asparagine	0.415723	0.170428	0.46875	Asparagine	14	0.487102	0.451613
Aspartate	0.415723	0.170428	0.46875	Aspartate	16	0.556688	0.516129
Cysteine	0.157051	0.0643841	0.177083	Cysteine	5	0.173965	0.16129
Glutamate	0.452676	0.185578	0.510417	Glutamate	17	0.591481	0.548387
Glutamine	0.452676	0.185578	0.510417	Glutamine	2	0.069586	0.0645161
Glycine	1.0624	0.435539	1.19792	Glycine	27	0.939411	0.870968
Histidine	0.166289	0.0681714	0.1875	Histidine	4	0.139172	0.129032
Isoleucine	0.498868	0.204514	0.5625	Isoleucine	11	0.382723	0.354839
Leucine	0.776016	0.318133	0.875	Leucine	18	0.626274	0.580645
Lysine	0.591251	0.242387	0.666667	Lysine	2	0.069586	0.0645161
Methionine	0.26791	0.109832	0.302083	Methionine	4	0.139172	0.129032
Phenylalanine	0.32334	0.132555	0.364583	Phenylalanine	8	0.278344	0.258065
Proline	0.37877	0.155279	0.427083	Proline	12	0.417516	0.387097
Serine	0.369532	0.151492	0.416667	Serine	8	0.278344	0.258065
Threonine	0.4342	0.178003	0.489583	Threonine	18	0.626274	0.580645
Tryptophan	0.101621	0.0416603	0.114583	Tryptophan	14	0.487102	0.451613
Tyrosine	0.240196	0.0984698	0.270833	Tyrosine	10	0.34793	0.322581
Valine	0.729825	0.299197	0.822917	Valine	21	0.730653	0.677419
